# Supplementary material
Source: publisher site journal article supplement (https://www.dovepress.com/article/355589)
Supplement: Supplementary file 1 [file get_supplementary_file.php]

**FitMáx© questionnaire (Goof Schep & Martijn van Hooff, 2018)**

**List of questions regarding your fitness**

To determine how well you can walk/run, cycle and climb stairs, please answer the following questions by selecting **one** of the options below.

Choose the answer that best describes how well you can walk/run, cycle and climb stairs. This is what you can just maintain.

If you never walk/run, cycle or climb stairs, then try to imagine how it would be if you were to do this at this moment in time.

## 1. Walking/running at this moment in time

How well can you walk/run **at the moment**? Please select only **one** of the following options.

|                       |                                                                                              |
|-----------------------|----------------------------------------------------------------------------------------------|
| <input type="radio"/> | When I walk, I can't carry on for long and have to <b>rest after 100 metres</b> .            |
| <input type="radio"/> | When I walk, I can't carry on for long and have to <b>rest after 200 metres</b> .            |
| <input type="radio"/> | When I walk, I can't carry on for long and have to <b>rest after 500 metres</b> .            |
| <input type="radio"/> | I can walk for <b>15 minutes</b> at a pace of <b>4 kilometres per hour (a gentle pace)</b> . |
| <input type="radio"/> | I can walk for <b>30 minutes</b> at a pace of <b>4 kilometres per hour (a gentle pace)</b> . |
| <input type="radio"/> | I can walk for <b>30 minutes</b> at a pace of <b>5 kilometres per hour (a normal pace)</b> . |
| <input type="radio"/> | I can walk for <b>30 minutes</b> at a pace of <b>6 kilometres per hour (brisk pace)</b> .    |
| <input type="radio"/> | I can <b>jog</b> for <b>30 minutes</b> at a pace of <b>7 kilometres per hour</b> .           |
| <input type="radio"/> | I can <b>run</b> for <b>30 minutes</b> at a pace of <b>8-9 kilometres per hour</b> .         |
| <input type="radio"/> | I can <b>run</b> for <b>30 minutes</b> at a pace of <b>10-11 kilometres per hour</b> .       |
| <input type="radio"/> | I can <b>run</b> for <b>30 minutes</b> at a pace of <b>12-13 kilometres per hour</b> .       |
| <input type="radio"/> | I can <b>run</b> for <b>30 minutes</b> at a pace of <b>14-15 kilometres per hour</b> .       |
| <input type="radio"/> | I can <b>run</b> for <b>30 minutes</b> at a pace of <b>16-18 kilometres per hour</b> .       |
| <input type="radio"/> | I can <b>run</b> for <b>30 minutes</b> at a pace <b>above 18 kilometres per hour</b> .       |

## 2. Cycling at this moment in time

How well can you cycle **at the moment**? Please select only **one** of the following options.

|                       |                                                                                                                                                           |
|-----------------------|-----------------------------------------------------------------------------------------------------------------------------------------------------------|
| <input type="radio"/> | I am <b>not able</b> to cycle for <b>15 minutes</b> on a flat road with no headwind on a normal bicycle.                                                  |
| <input type="radio"/> | I can cycle for <b>15 minutes</b> on a flat road with no headwind on a normal bicycle, at a pace of <b>10-12 kilometres per hour (an idle pace)</b> .     |
| <input type="radio"/> | I can cycle for <b>15 minutes</b> on a flat road with no headwind on a normal bicycle at a pace of <b>13-15 kilometres per hour (a very slow pace)</b> .  |
| <input type="radio"/> | I can cycle for <b>30 minutes</b> on a flat road with no headwind on a normal bicycle, at a pace of <b>10-12 kilometres per hour (an idle pace)</b> .     |
| <input type="radio"/> | I can cycle for <b>30 minutes</b> on a flat road with no headwind on a normal bicycle, at a pace of <b>13-15 kilometres per hour (a very slow pace)</b> . |
| <input type="radio"/> | I can cycle for <b>30 minutes</b> on a flat road with no headwind on a normal bicycle, at a pace of <b>16-18 kilometres per hour (a gentle pace)</b> .    |
| <input type="radio"/> | I can cycle for <b>30 minutes</b> on a flat road with no headwind on a normal bicycle, at a pace of <b>19-21 kilometres per hour (a normal pace)</b> .    |
| <input type="radio"/> | I can cycle for <b>30 minutes</b> on a flat road with no headwind on a normal bicycle, at a pace of <b>22-24 kilometres per hour (a brisk pace)</b> .     |
| <input type="radio"/> | I can cycle for <b>30 minutes</b> on a flat road with no headwind on a racing bike, at a pace of <b>25-30 kilometres per hour</b> .                       |
| <input type="radio"/> | I can cycle for <b>30 minutes</b> on a flat road with no headwind on a racing bike, at a pace of <b>30-35 kilometres per hour</b> .                       |
| <input type="radio"/> | I can cycle for <b>30 minutes</b> on a flat road with no headwind on a racing bike, at a pace of <b>35-40 kilometres per hour</b> .                       |
| <input type="radio"/> | I can cycle for <b>30 minutes</b> on a flat road with no headwind on a racing bike, at a pace <b>above 40 kilometres per hour</b> .                       |

### 3. Climbing stairs at this moment in time

How well can you climb stairs **at the moment**? Please select only **one** of the following options.

|                       |                                                                                                |
|-----------------------|------------------------------------------------------------------------------------------------|
| <input type="radio"/> | I am <b>not able</b> to walk up 1 flight of stairs without stopping.                           |
| <input type="radio"/> | I <b>am able</b> to climb <b>1 flight of stairs at a very slow pace</b> without stopping       |
| <input type="radio"/> | I can walk up <b>2 flights of stairs at a very slow pace</b> without stopping.                 |
| <input type="radio"/> | I can walk up <b>3 flights of stairs at a very slow pace</b> without stopping.                 |
| <input type="radio"/> | I can walk up <b>4 flights of stairs at a very slow pace</b> without stopping.                 |
| <input type="radio"/> | I can walk up <b>5 flights of stairs at a very slow pace</b> without stopping.                 |
| <input type="radio"/> | I can walk up <b>5 flights of stairs at a gentle pace</b> without stopping.                    |
| <input type="radio"/> | I can walk up <b>5 flights of stairs at a normal pace</b> without stopping.                    |
| <input type="radio"/> | I can walk up <b>5 flights of stairs, taking two steps at a time</b> , without stopping.       |
| <input type="radio"/> | I can <b>run</b> up <b>5 flights of stairs</b> , without stopping.                             |
| <input type="radio"/> | I can <b>run</b> up <b>5 flights of stairs, taking two steps at a time</b> , without stopping. |

#### 4. Were you able to answer these questions easily?

You have answered questions about how well you can walk/run, cycle or climb stairs **at the moment**. How well could you answer the questions? Circle the number that matches your experience with answering the questions.

|                          |                                       |   |   |   |   |   |   |   |   |   |    |                                   |
|--------------------------|---------------------------------------|---|---|---|---|---|---|---|---|---|----|-----------------------------------|
| <b>1. Walk/run</b>       | I could not estimate/answer correctly | 1 | 2 | 3 | 4 | 5 | 6 | 7 | 8 | 9 | 10 | I could estimate/answer correctly |
| <b>2. Cycling</b>        | I could not estimate/answer correctly | 1 | 2 | 3 | 4 | 5 | 6 | 7 | 8 | 9 | 10 | I could estimate/answer correctly |
| <b>3. Walking stairs</b> | I could not estimate/answer correctly | 1 | 2 | 3 | 4 | 5 | 6 | 7 | 8 | 9 | 10 | I could estimate/answer correctly |

#### 5. Circle one option which is most appropriate for you

When, regardless of your fitness, you have stopped cycling, walking or climbing stairs because you have reached your limit:

- I am short of breath
- I feel pressure or pain on my chest
- My legs have given up
- I have problems with my joints
